# Supplementary material for: Large-scale preparation of Mg doped LiFePO4@C for lithium ion batteries via carbon thermal reduction combined with aqueous rheological phase technology
Source: Royal Society of Chemistry journal article supplement (doi:10.1039/c5ra11680e), 2015-01-01
Supplement: c5ra11680e1.pdf [file c5ra11680e1.pdf]

## Electronic Supplementary Information (ESI) for Large-scale preparation of Mg doped $\text{LiFePO}_4@C$ for lithium ion batteries via carbon thermal reduction combined with aqueous rheological phase technology

Yuanchao Li,<sup>a</sup> Jinghao Hao,<sup>b</sup> Guangwei Geng,<sup>a</sup> Yafang Wang,<sup>a</sup> Xiaokun Shang,<sup>a</sup> Changchun

Yang\*<sup>a</sup> and Baojun Li\*<sup>a</sup>

<sup>a</sup> College of Chemistry and Molecular Engineering, Zhengzhou University, Zhengzhou 450001, P.

R. China

<sup>b</sup> Department of Quality Examination and Management, Henan University of Animal Husbandry  
and Economy, Zhengzhou 450011, P. R. China

\*Corresponding author. E-mail: changchunyangzzu@126.com and lbjfc1@zzu.edu.cn

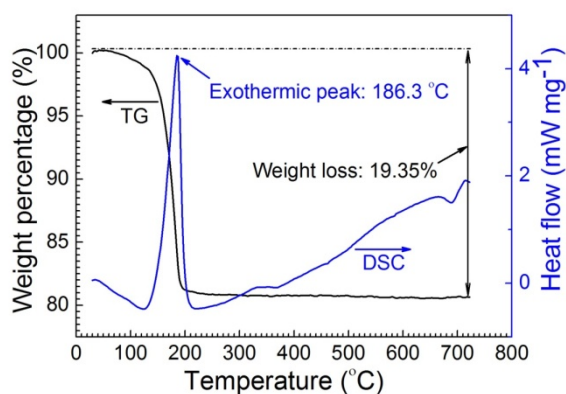

**Figure S1.** TG-DSC curves of  $\text{FePO}_4 \cdot 2\text{H}_2\text{O}$ .

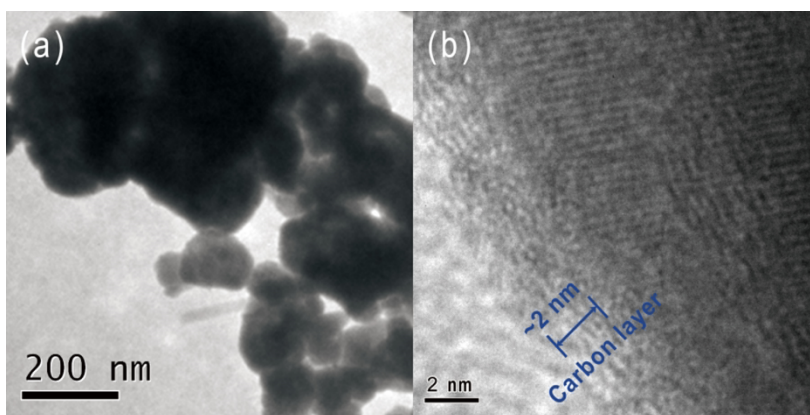

**Figure S2.** TEM images of the al-LFP.

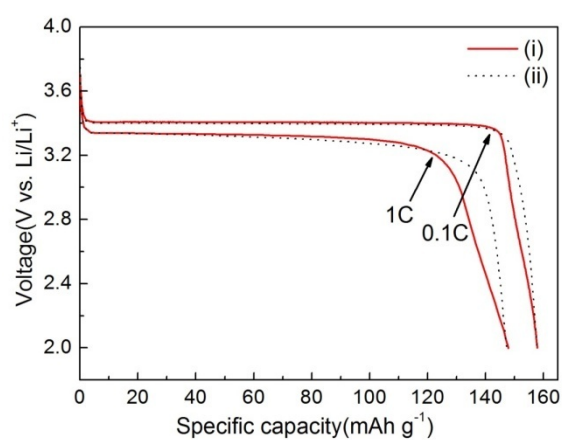

**Figure S3.** Discharge curves of the al-LFP (i) and the commercial  $\text{LiFePO}_4$  product (ii).

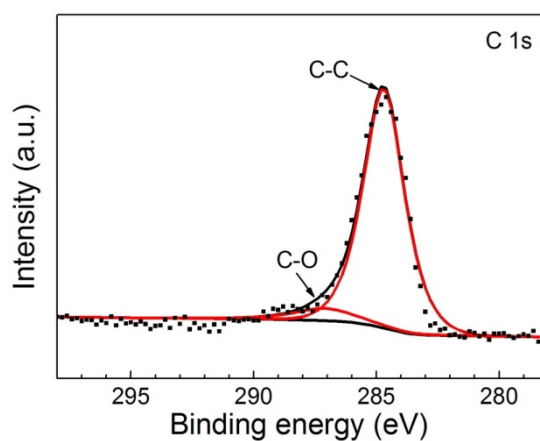

**Figure S4.** XPS spectra of C1s spectra of the al-LFP sample.

**Table S1.** Lattice parameters of the al-LFP and aq-LFP samples, and crystallite sizes calculated by the Scherrer's equation.

| Samples               | al-LFP    | aq-LFP     |
|-----------------------|-----------|------------|
| Lattice constant/Å    |           |            |
| $a/\text{Å}$          | 10.314(4) | 10.312(21) |
| $b/\text{Å}$          | 6.000(98) | 5.999(55)  |
| $c/\text{Å}$          | 4.689(82) | 4.689(89)  |
| $v/\text{Å}^3$        | 290.27(4) | 290.15(7)  |
| Reliability factors/% |           |            |
| $R_p(\%)$             | 11.3      | 11.1       |
| $R_{wp}(\%)$          | 7.20      | 7.02       |
| $R_{exp}(\%)$         | 5.63      | 5.75       |
| $\chi^2$              | 1.63      | 1.49       |
| $R_{Bragg}(\%)$       | 5.73      | 4.93       |
| $R_f(\%)$             | 4.51      | 4.01       |

**Table S2.** Elemental composition of the al-LFP and aq-LFP samples determined using ICP (the other elements were not calculated\*).

| Sample                | Li      | Fe      | Mg     | P     |
|-----------------------|---------|---------|--------|-------|
| al-LFP                | 0.97(9) | 0.98(4) | 0.0093 | 1     |
| aq-LFP                | 0.98(7) | 0.97(2) | 0.0090 | 1     |
| <b>Recovery rates</b> | 1.01    | 0.987   | ----   | 0.985 |

\*Molar ratio was based on element P as 1.
